# Supplementary material
Source: Springer Nature journal article supplement (https://www.springermedizin.de/resource/supplementary/12885_2014_5100_MOESM5_ESM.pdf/9468414)

Figure 3

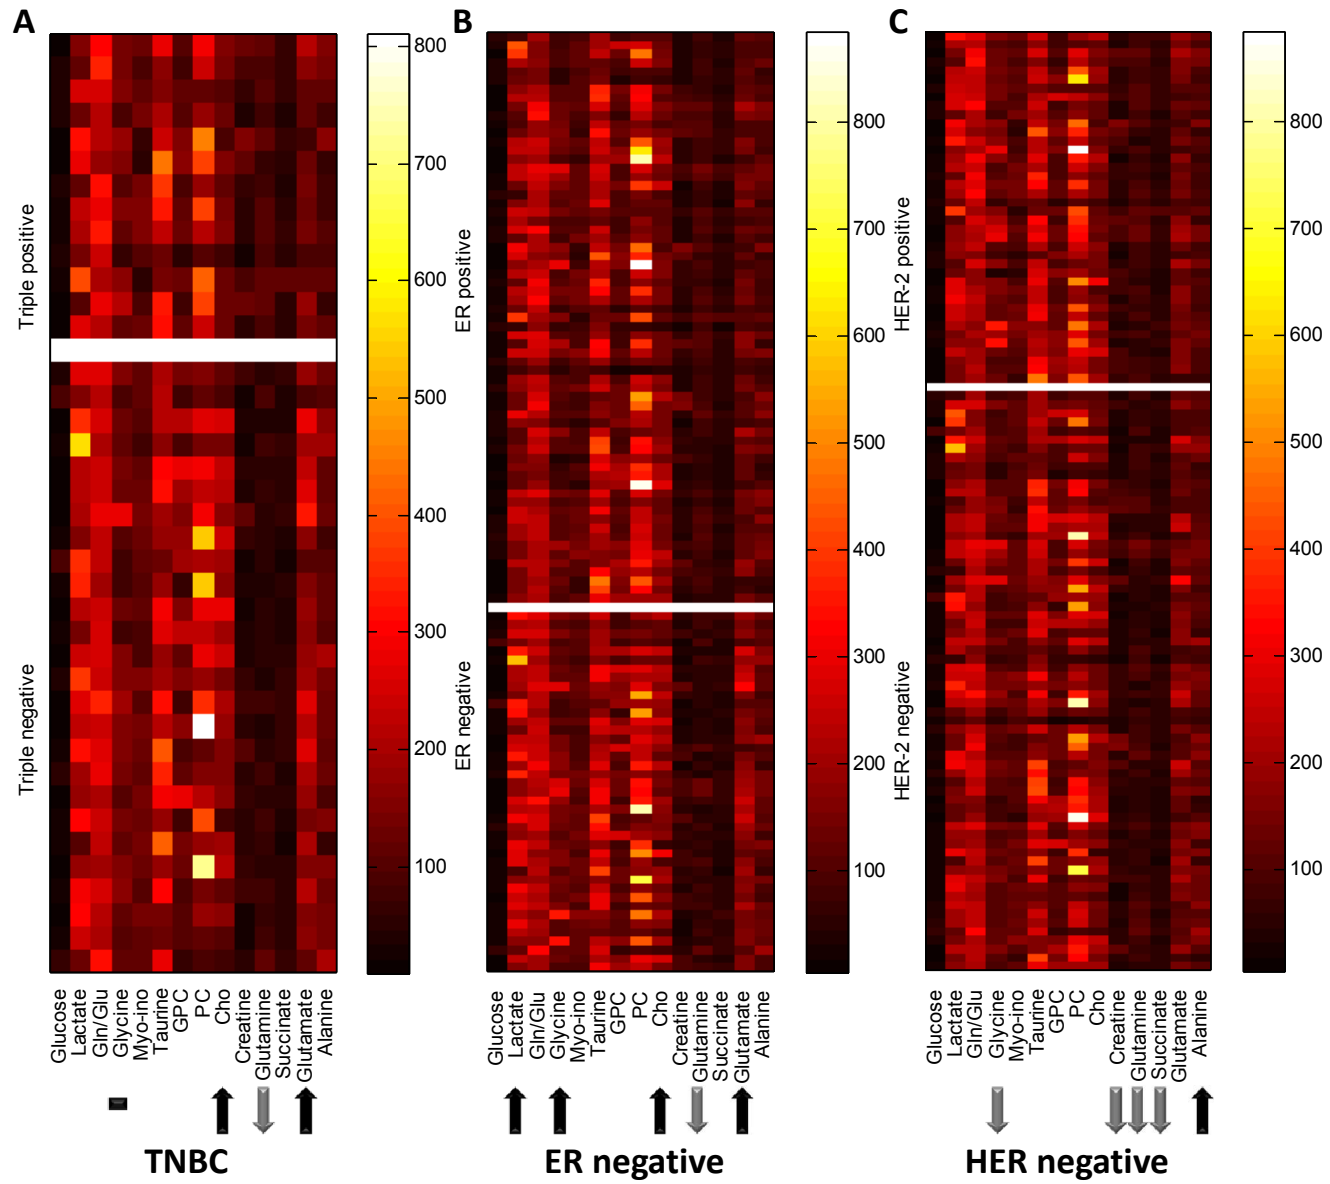

Supplement: MOESM5 [file 9468414]
